# Supplementary material for: Enhanced capacity of aluminum-ion batteries by adjusting the average pore size of the porous carbon cathode
Source: Royal Society of Chemistry journal article supplement (doi:10.1039/d4ta08671f), 2025-01-01
Supplement: d4ta08671f1.pdf [file d4ta08671f1.pdf]

1 Enhanced capacity of aluminum-ion batteries by  
2 adjusting the average pore size of the porous carbon  
3 cathodes

4 *Yifeng Chen<sup>a</sup>, Hiroo Suzuki<sup>a</sup>, Shu Fukumoto<sup>a</sup>, Chiyu Nakano<sup>b</sup>, Takeshi Nishikawa<sup>a</sup>, Shigeyuki*

5 *Umezawa<sup>c</sup>, Yasuhiko Hayashi<sup>a</sup>*

6 <sup>a</sup>Graduate School of Environmental, Life, Natural Science, and Technology, Okayama

7 University, Okayama 700-8530, Japan

8 <sup>b</sup>Department of Comprehensive Technical Solutions, Okayama University, Okayama 700-8530,

9 Japan

10 <sup>c</sup>Seiwa Electric Mfg. Co., Ltd., Kyoto 610-0192, Japan

11

12

13

14

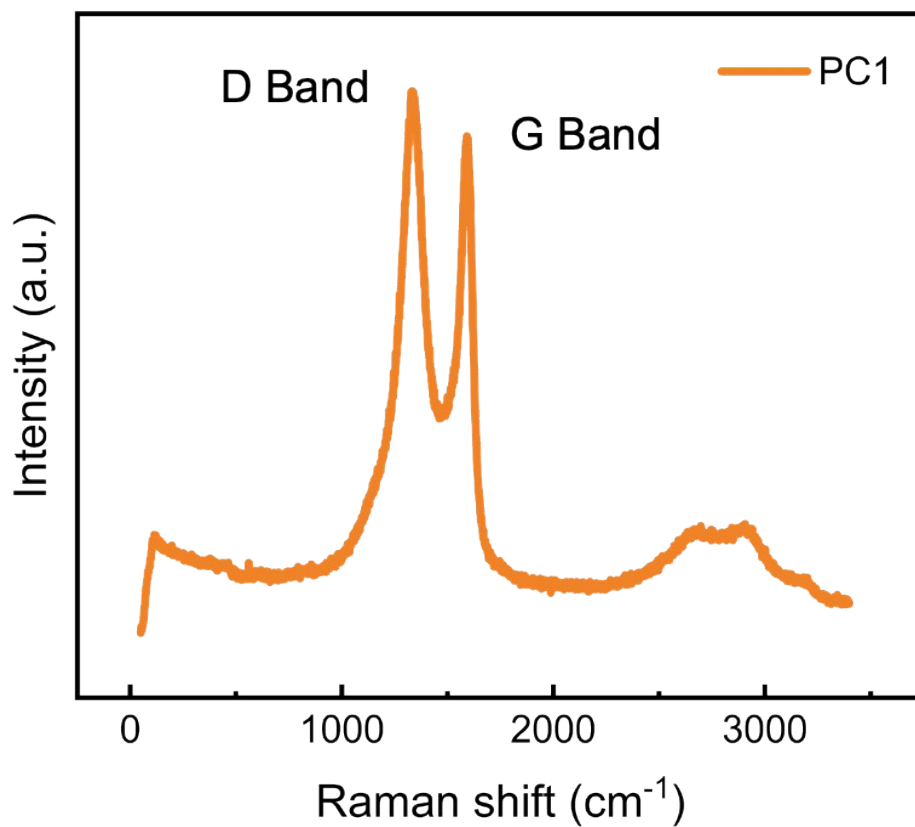

15

16 **Fig. S1** Raman spectra of PC1

17 PC1 (YP50F) was commercially purchased and directly used as a cathode material

18

19

20

21

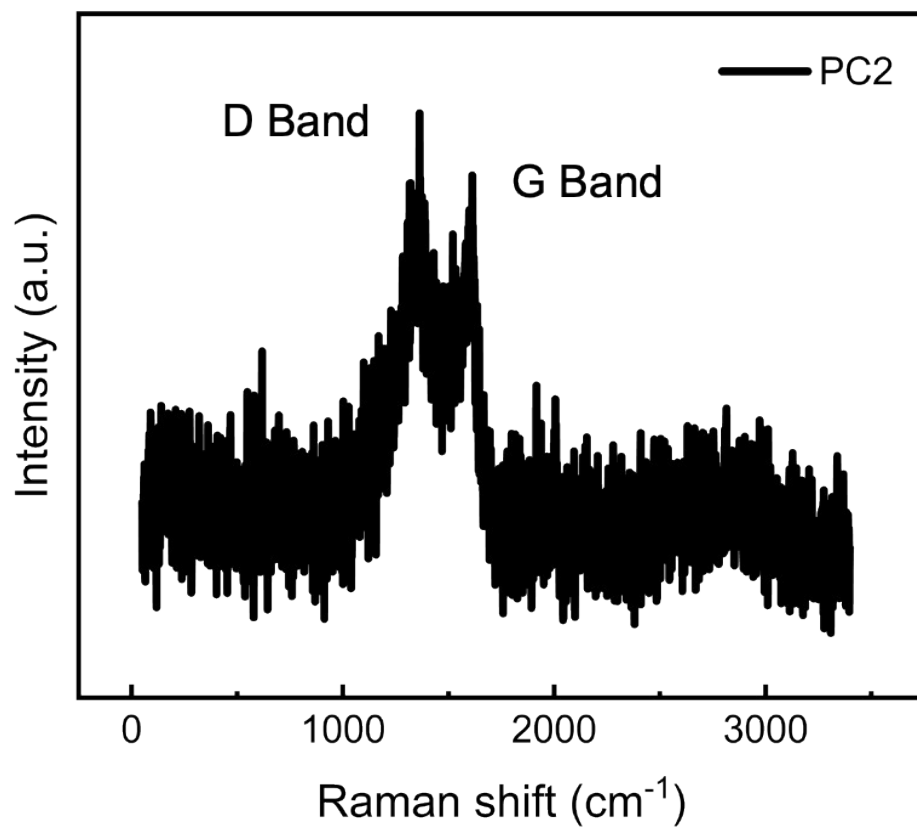

22

23 **Fig. S2** Raman spectra of PC2

24 PC2 (MSP-20) was commercially purchased and directly used as a cathode material

25

26

27

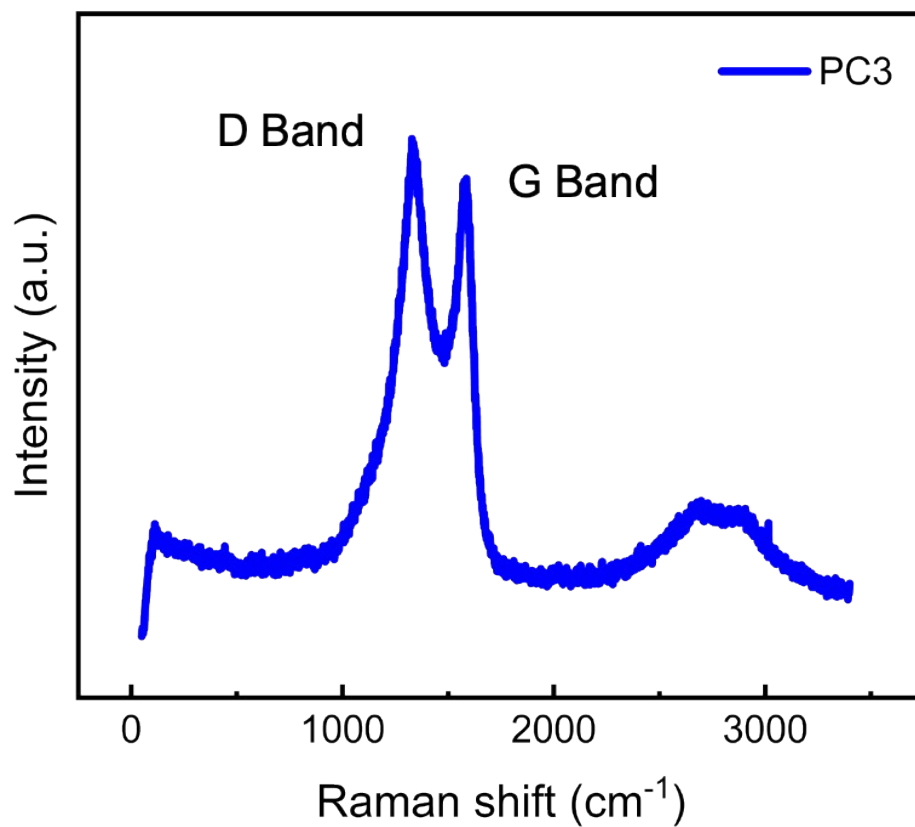

28

29 **Fig. S3** Raman spectra of PC3

30 PC3 (MSA-20) was commercially purchased and directly used as a cathode material

31

32

33

34

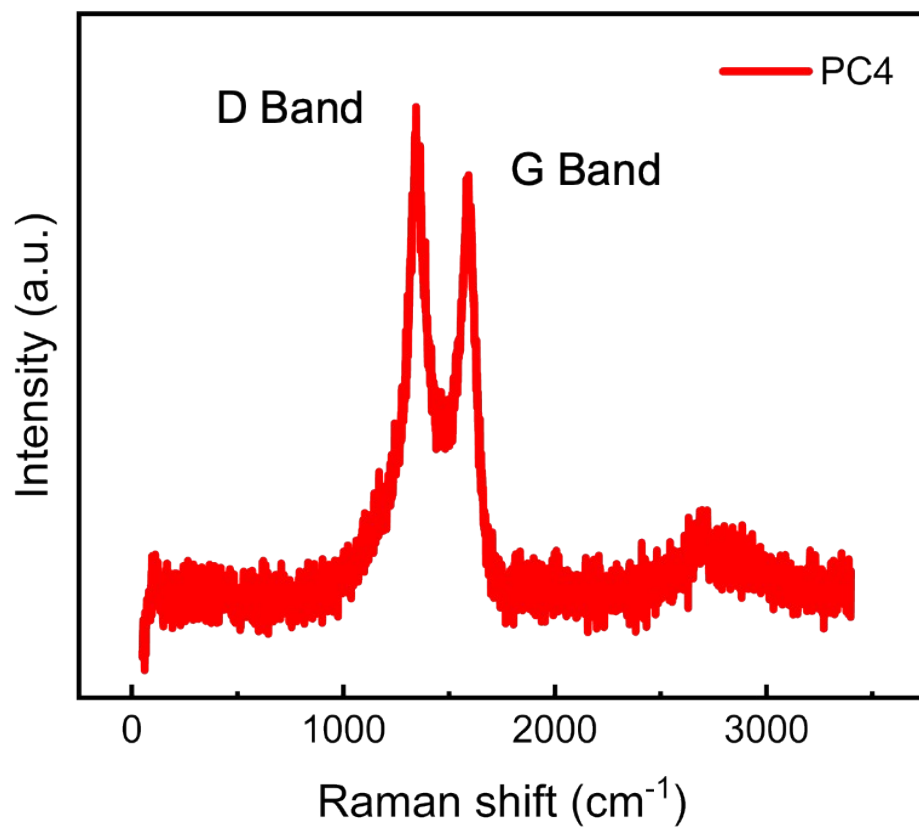

35

36 **Fig. S4** Raman spectra of PC4

37 PC4 (MSC-30) was commercially purchased and directly used as a cathode material

38

39

40

41

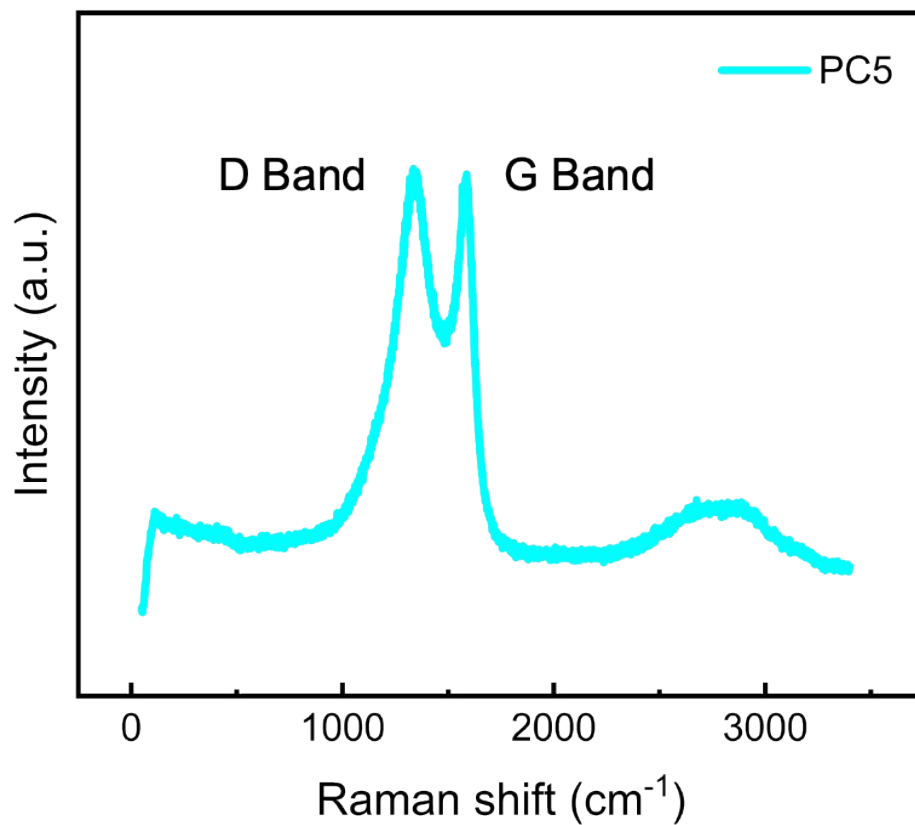

42

43 **Fig. S5** Raman spectra of PC5

44 PC5 (CNovel 20 nm) was commercially purchased and directly used as a cathode material

45

46

47

48

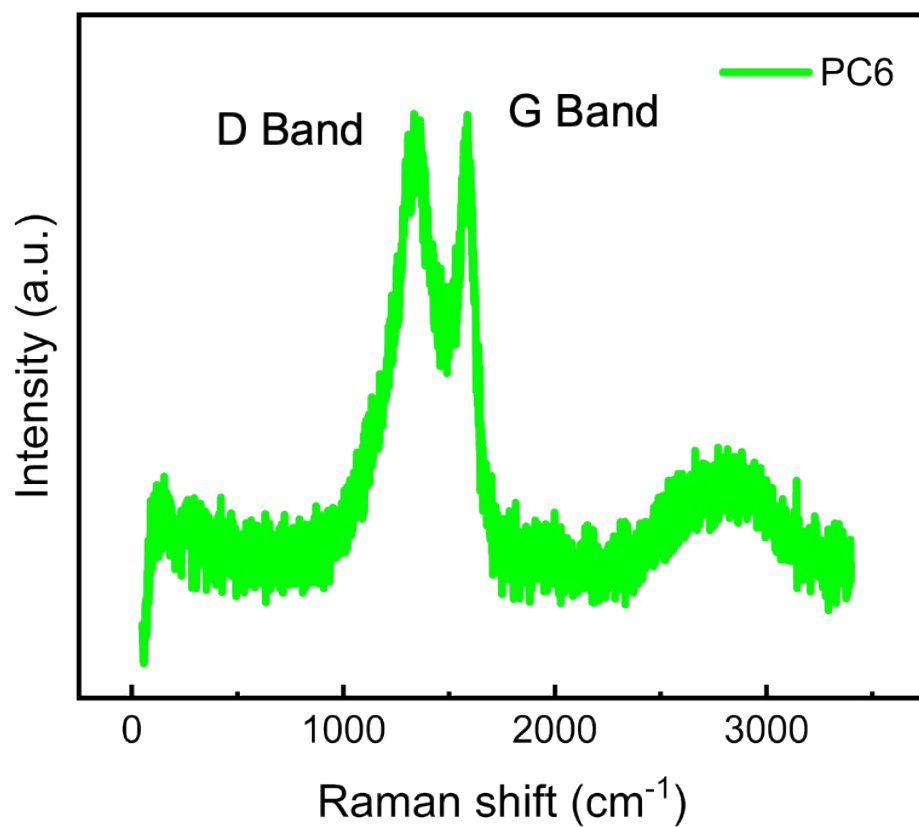

49

50 **Fig. S6** Raman spectra of PC6

51 PC6 (CNovel MJ4 010-00) was commercially purchased and directly used as a cathode material

52

53

54

55

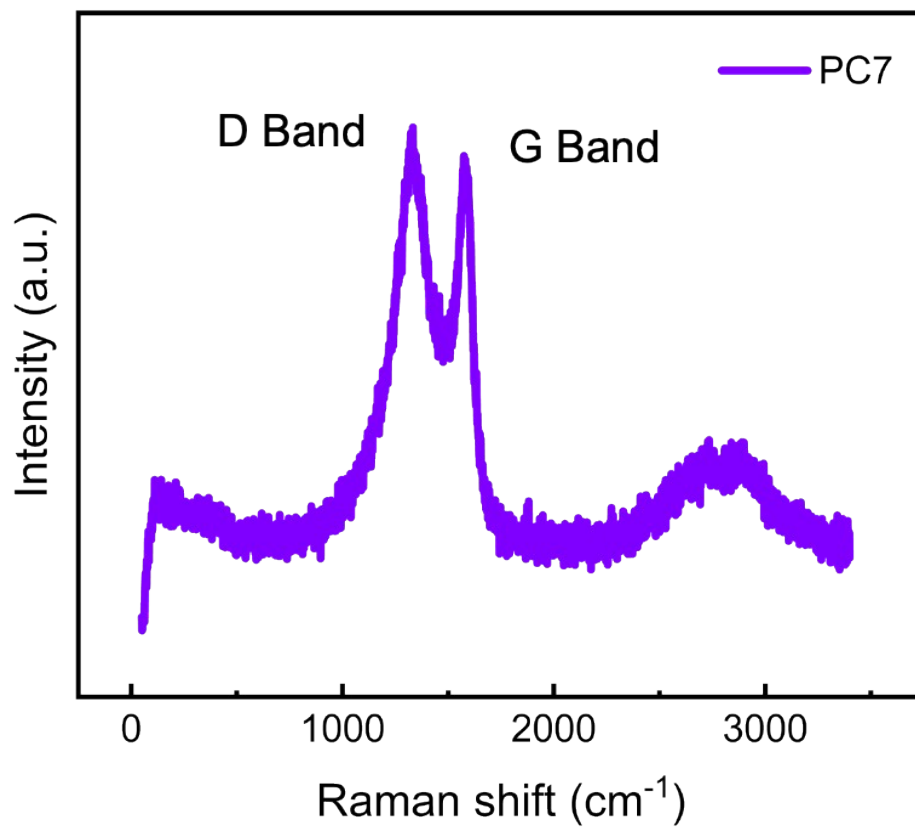

56

57 **Fig. S7** Raman spectra of PC7

58 PC7 (CNovel MH-00) was commercially purchased and directly used as a cathode material

59

60

61

62

63

64



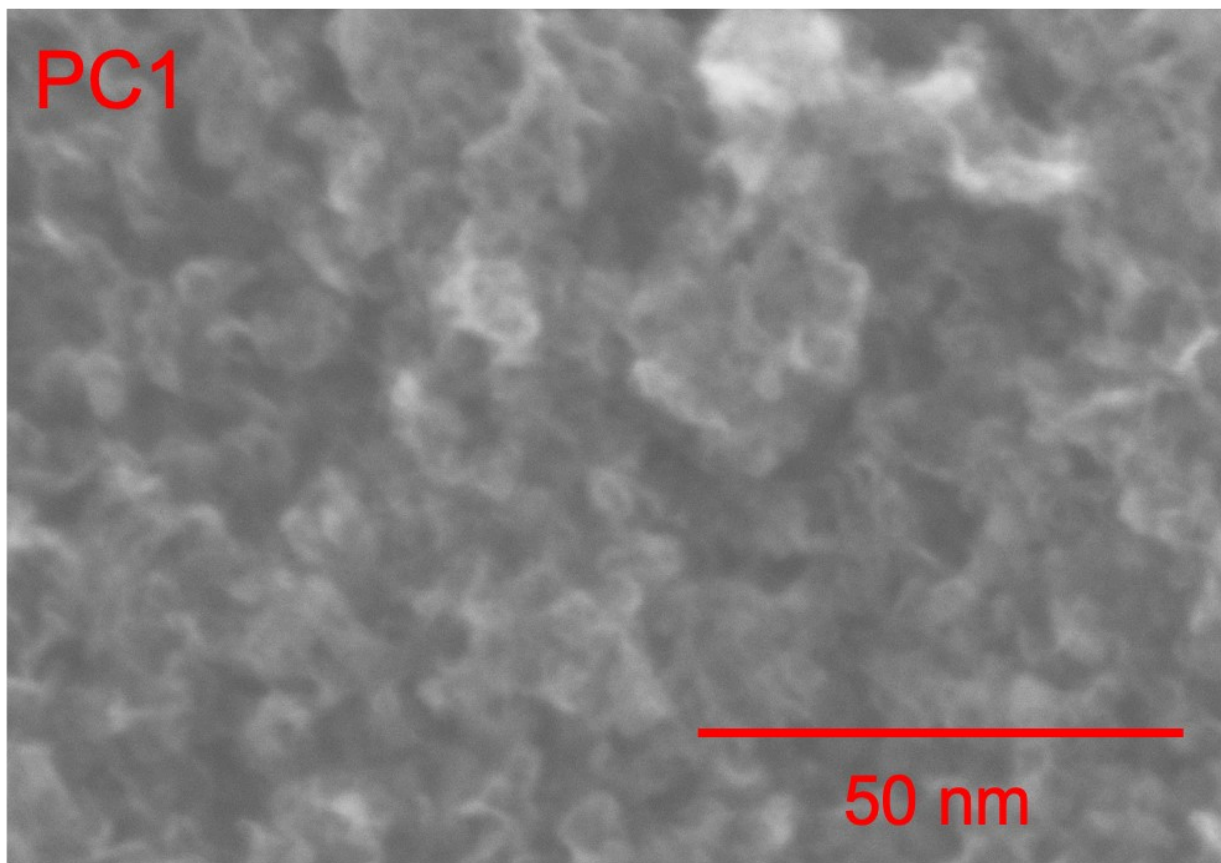

65

66 **Fig. S8** Field emission scanning electron microscope image of the top view of PC1

67 PC1 (YP50F) was commercially purchased and directly used as a cathode material

68

69

70

71

72

73

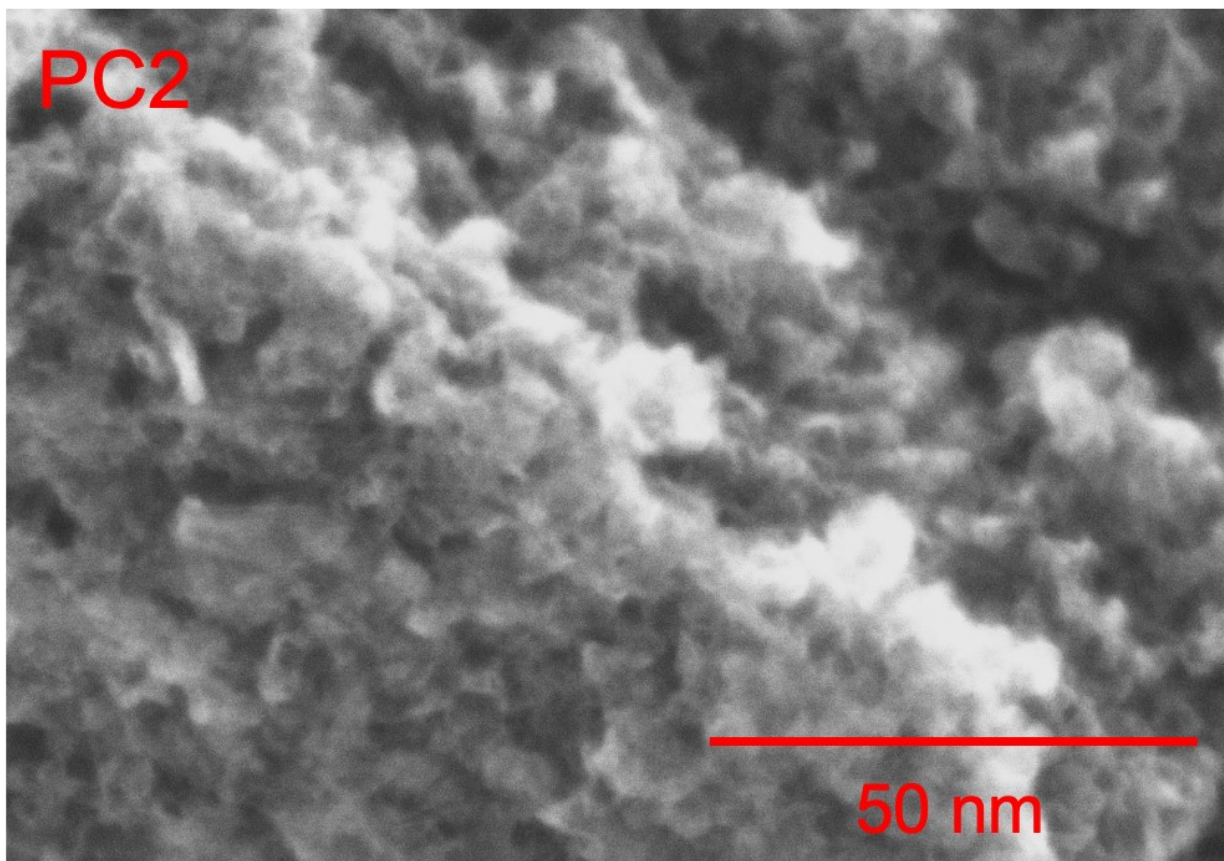

74

75 **Fig. S9** Field emission scanning electron microscope image of the top view of PC2

76 PC2 (MSP-20) was commercially purchased and directly used as a cathode material

77

78

79

80

81

82

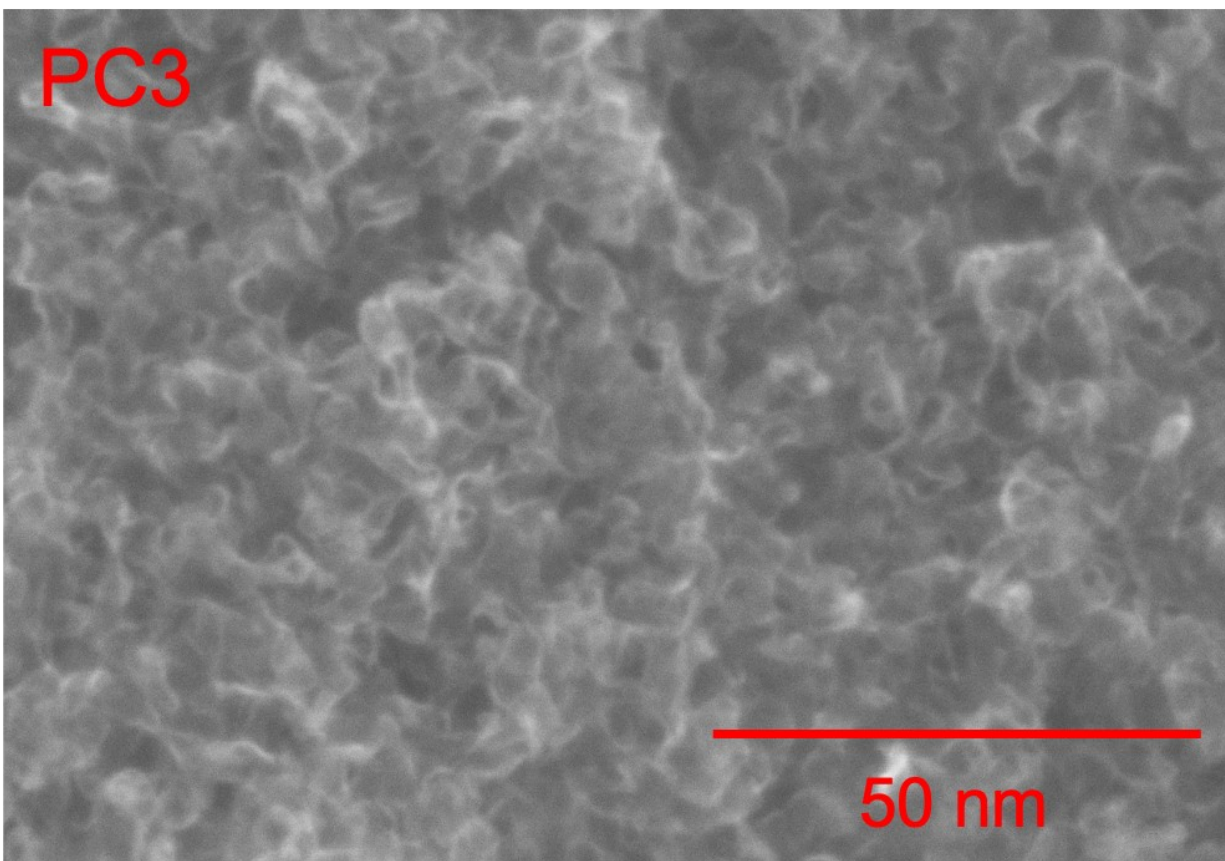

83

84 **Fig. S10** Field emission scanning electron microscope image of the top view of PC3

85 PC3 (MSA-20) was commercially purchased and directly used as a cathode material

86

87

88

89

90

91

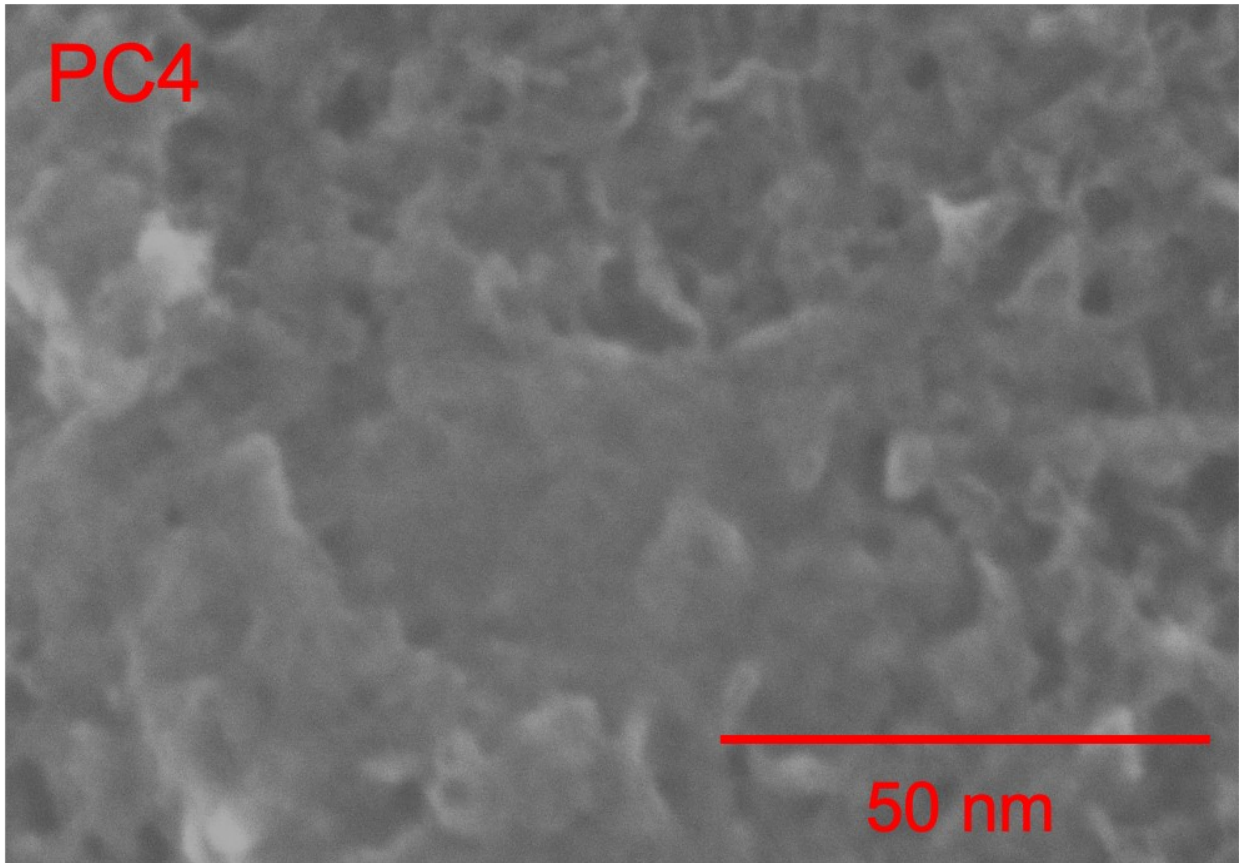

92

93 **Fig. S11** Field emission scanning electron microscope image of the top view of PC4

94 PC4 (MSC-30) was commercially purchased and directly used as a cathode material

95

96

97

98

99

100

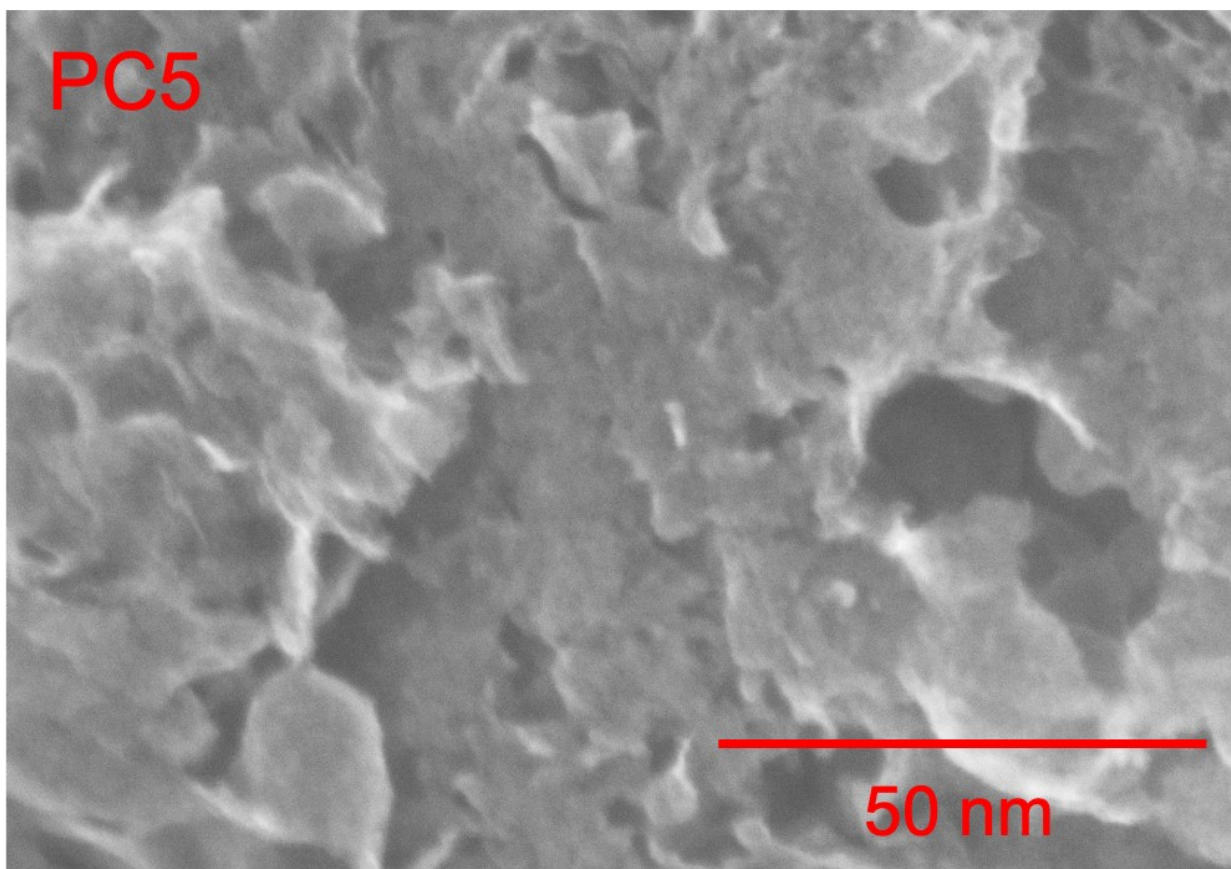

101

102 **Fig. S12** Field emission scanning electron microscope image of the top view of PC5

103 PC5 (CNovel 20 nm) was commercially purchased and directly used as a cathode material

104

105

106

107

108

109

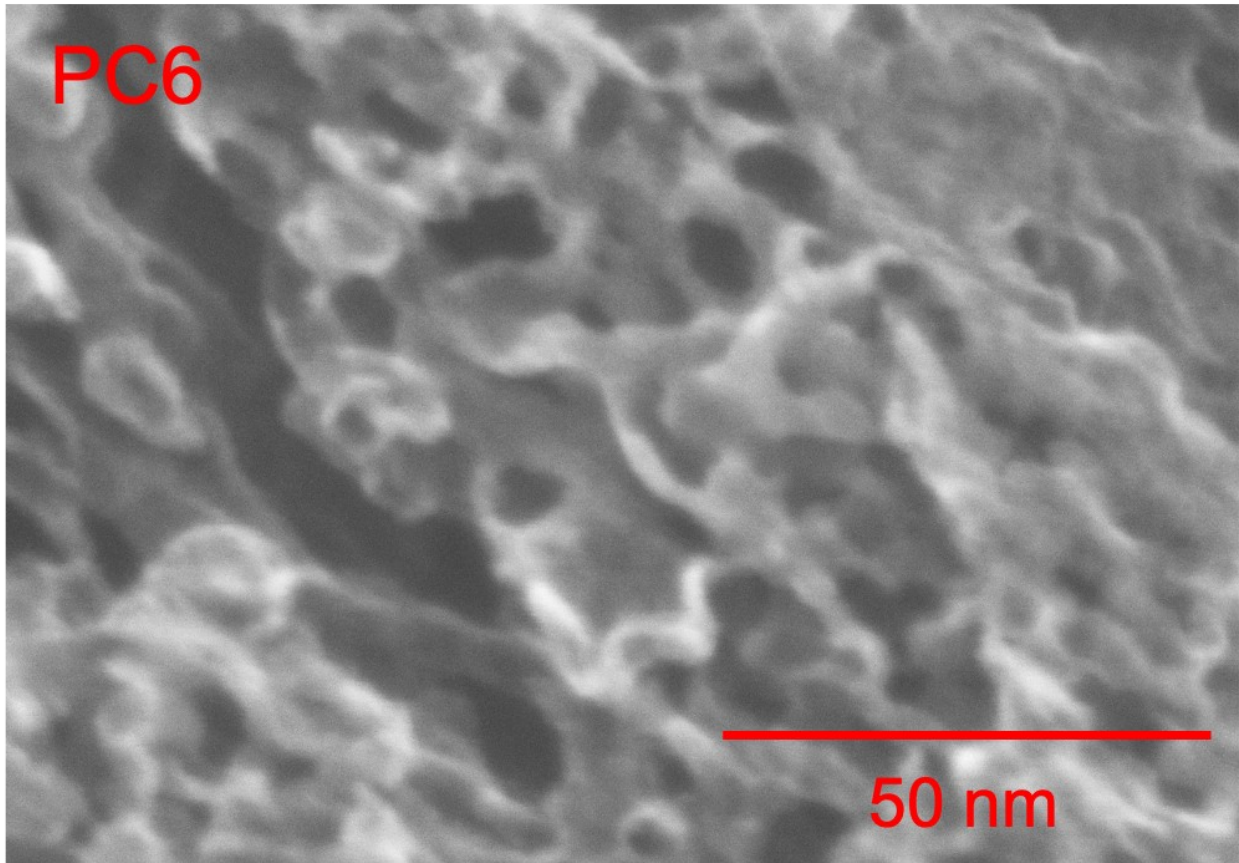

110

111 **Fig. S13** Field emission scanning electron microscope image of the top view of PC6

112 PC6 (CNovel MJ4 010-00) was commercially purchased and directly used as a cathode material

113

114

115

116

117

118

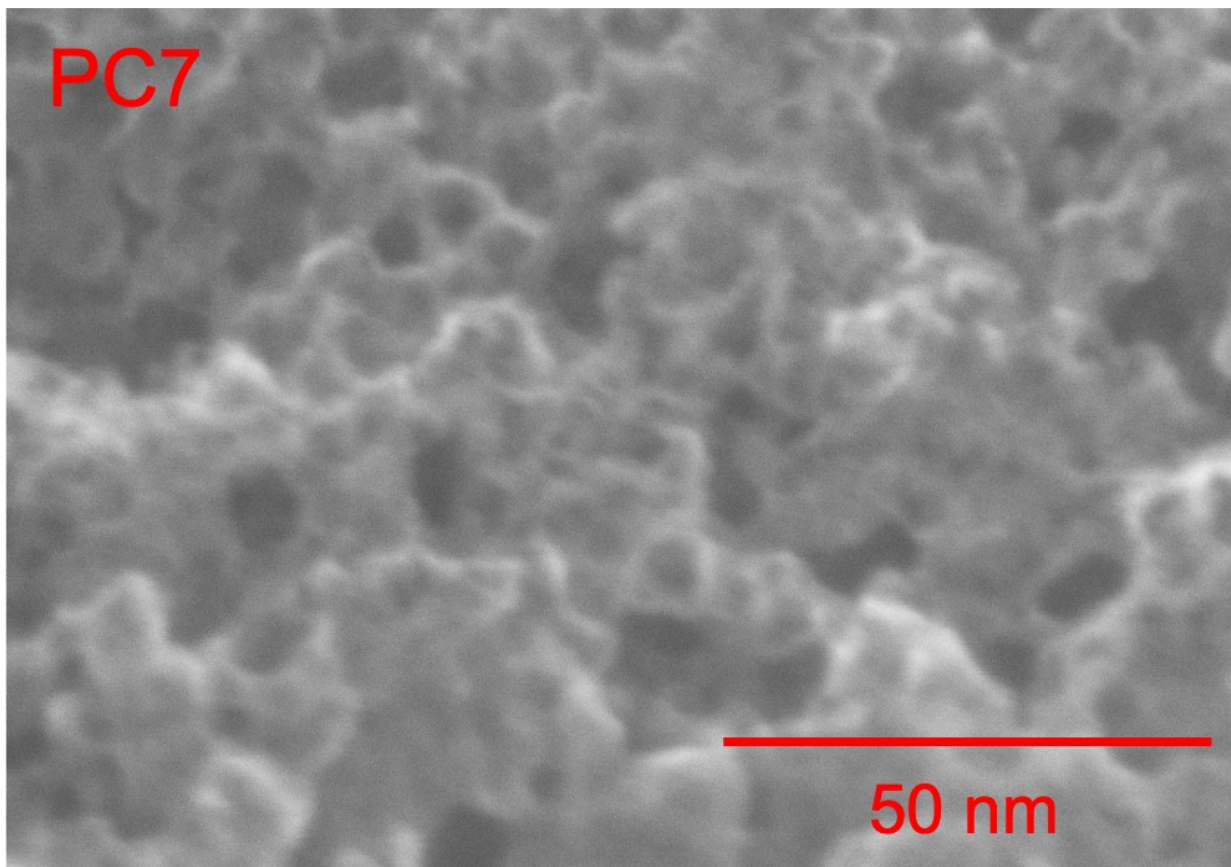

119

120 **Fig. S14** Field emission scanning electron microscope image of the top view of PC7

121 PC7 (CNovel MH-00) was commercially purchased and directly used as a cathode material

122

123

124

125

126

127

128

129 **Table S1** Specific surface area and pore structure characteristics of PC1, PC2, PC3, PC4, PC5,  
130 PC6 and PC7, along with the capacity at a current density of 0.1 A/g and the ratio of capacity to  
131 specific surface area.

| Sample | Average pore width (nm) | Specific surface area (m <sup>2</sup> /g) | Capacity at 0.1 A/g (mAh/g) | Capacity/Specific surface area |
|--------|-------------------------|-------------------------------------------|-----------------------------|--------------------------------|
| PC1    | 1.09                    | 1616                                      | 44.48                       | 0.03                           |
| PC2    | 1.09                    | 2266                                      | 9.48                        | 0.01                           |
| PC3    | 2.60                    | 2514                                      | 103.66                      | 0.04                           |
| PC4    | 2.48                    | 3299                                      | 137.81                      | 0.04                           |
| PC5    | 19.6                    | 709                                       | 70.79                       | 0.10                           |
| PC6    | 8.45                    | 1031                                      | 118.81                      | 0.12                           |
| PC7    | 4.43                    | 1500                                      | 128.79                      | 0.09                           |

132

133

134

135

136

137

138

139



140

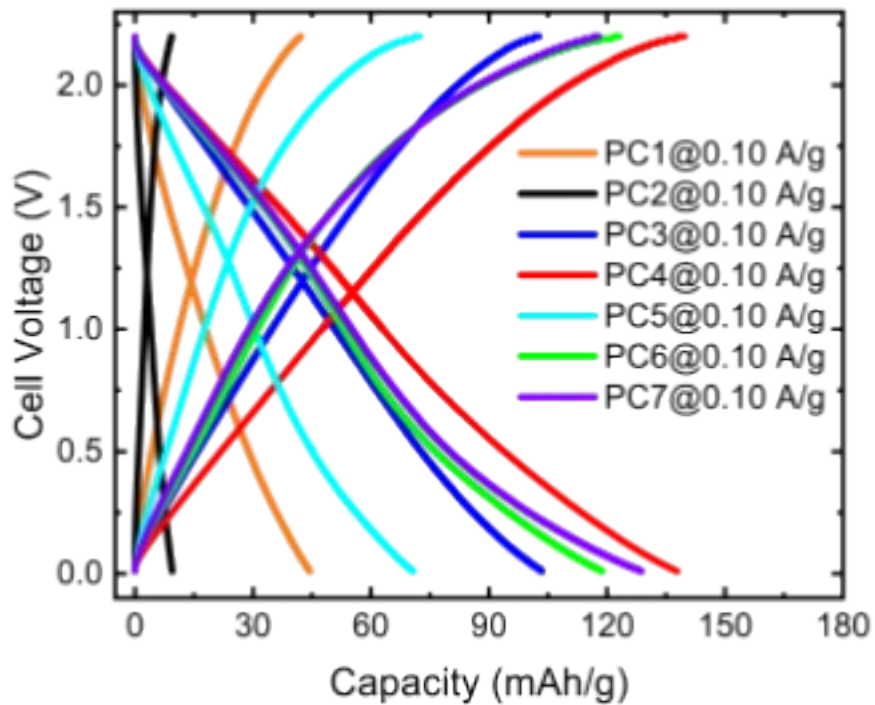

141

142 **Fig. S15** Discharge capability of aluminum-ion batteries with PC1, PC2, PC3, PC4, PC5, PC6,

143 and PC7 as cathode materials at a current density of 0.10 A/g

144 PC1 (YP50F), PC2 (MSP-20), PC3 (MSA-20), PC4 (MSC-30), PC5 (CNovel 20 nm), PC6

145 (CNovel MJ4 010-00), and PC7 (CNovel MH-00) were commercially purchased and directly

146 used as cathode materials

147

148

149

150

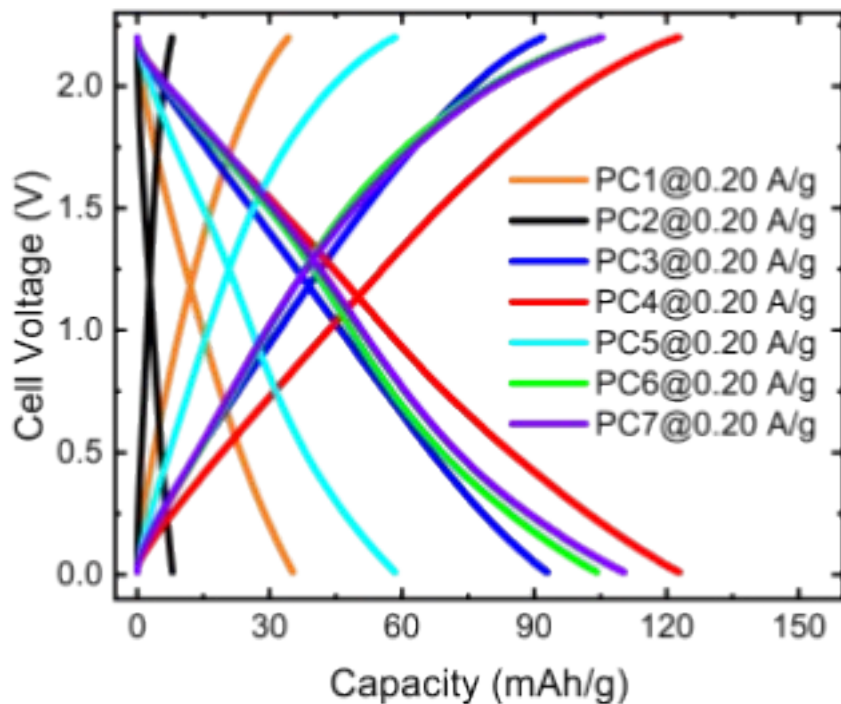

151

152 **Fig. S16** Discharge capability of aluminum-ion batteries with PC1, PC2, PC3, PC4, PC5, PC6,  
 153 and PC7 as cathode materials at a current density of 0.20 A/g

154 PC1 (YP50F), PC2 (MSP-20), PC3 (MSA-20), PC4 (MSC-30), PC5 (CNovel 20 nm), PC6  
 155 (CNovel MJ4 010-00), and PC7 (CNovel MH-00) were commercially purchased and directly  
 156 used as cathode materials

157

158

159

160

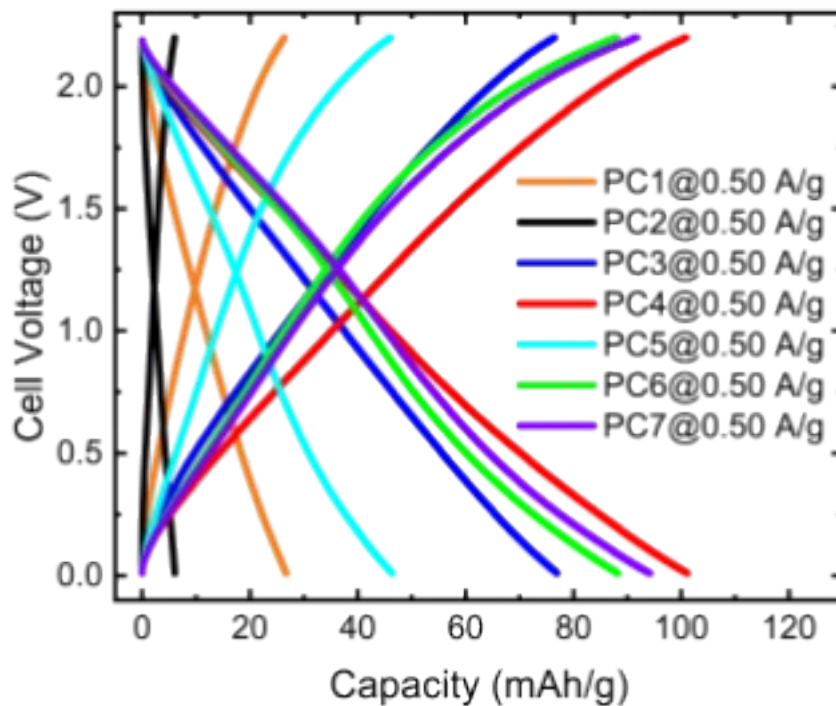

161

162 **Fig. S17** Discharge capability of aluminum-ion batteries with PC1, PC2, PC3, PC4, PC5, PC6,  
 163 and PC7 as cathode materials at a current density of 0.50 A/g

164 PC1 (YP50F), PC2 (MSP-20), PC3 (MSA-20), PC4 (MSC-30), PC5 (CNovel 20 nm), PC6  
 165 (CNovel MJ4 010-00), and PC7 (CNovel MH-00) were commercially purchased and directly  
 166 used as cathode materials

167

168

169

170

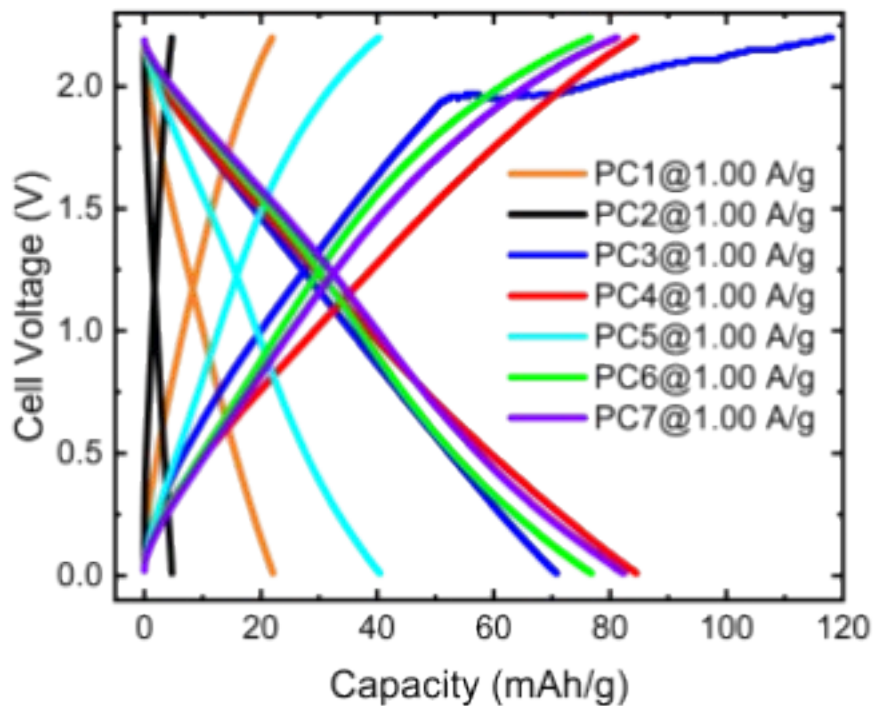

171

172 **Fig. S18** Discharge capability of aluminum-ion batteries with PC1, PC2, PC3, PC4, PC5, PC6,  
 173 and PC7 as cathode materials at a current density of 1.00 A/g

174 PC1 (YP50F), PC2 (MSP-20), PC3 (MSA-20), PC4 (MSC-30), PC5 (CNovel 20 nm), PC6  
 175 (CNovel MJ4 010-00), and PC7 (CNovel MH-00) were commercially purchased and directly  
 176 used as cathode materials

177

178

179

180

181

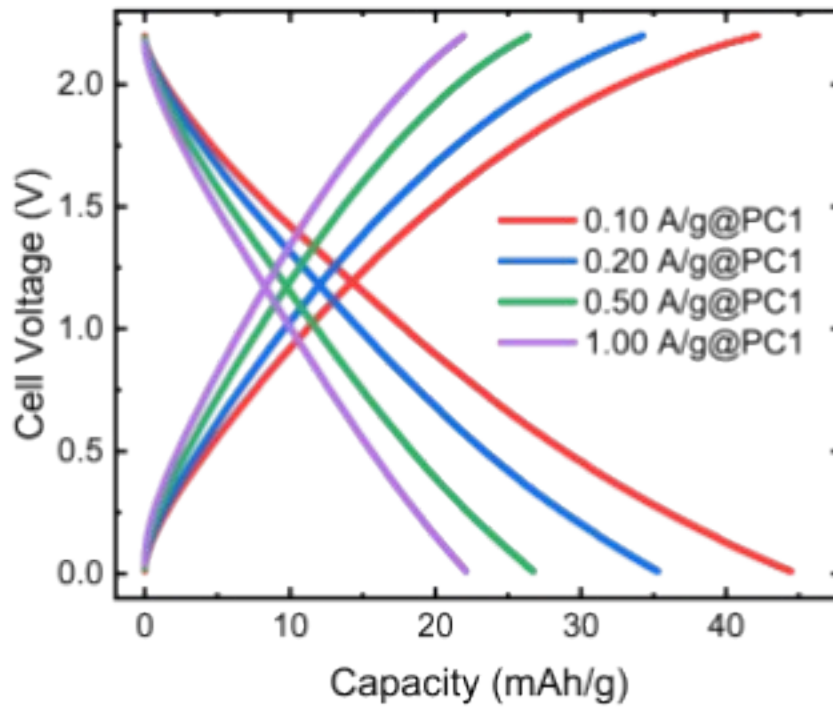

182

183 **Fig. S19** Galvanostatic charge and discharge curves of an aluminum-ion battery with the cathode

184 material of PC1 at a series of current densities

185 PC1 (YP50F) was commercially purchased and directly used as a cathode material

186

187

188

189

190

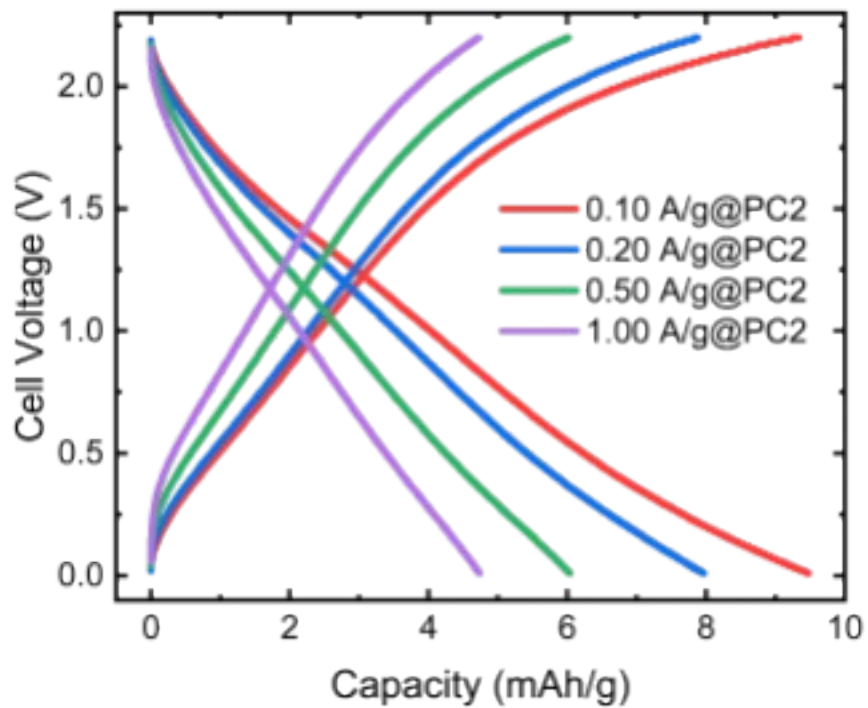

191

192 **Fig. S20** Galvanostatic charge and discharge curves of an aluminum-ion battery with the cathode  
193 material of PC2 at a series of current densities

194 PC2 (MSP-20) was commercially purchased and directly used as a cathode material

195

196

197

198

199

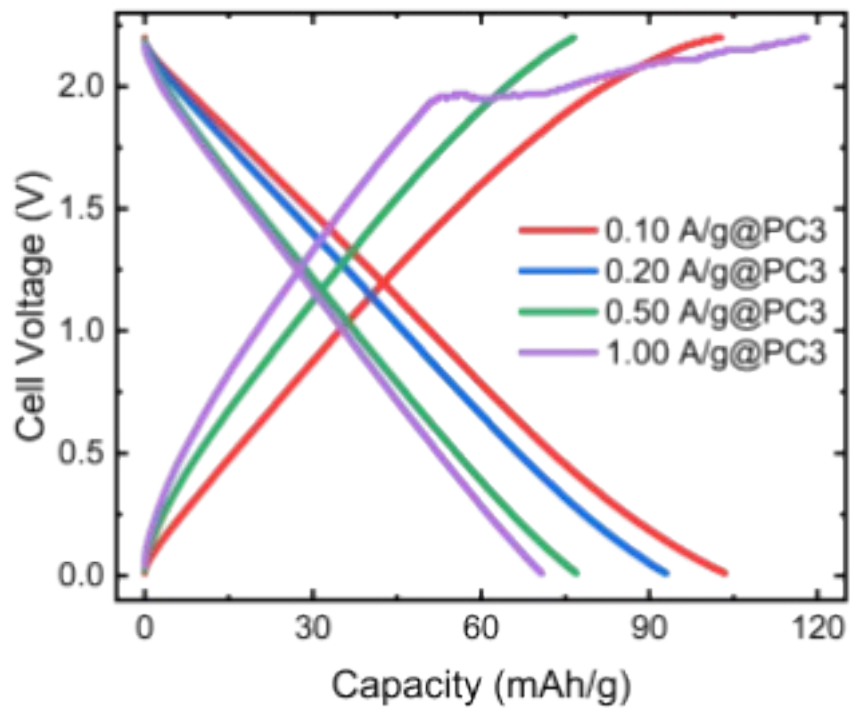

200

201 **Fig. S21** Galvanostatic charge and discharge curves of an aluminum-ion battery with the cathode  
 202 material of PC3 at a series of current densities

203 PC3 (MSA-20) was commercially purchased and directly used as a cathode material

204

205

206

207

208

209

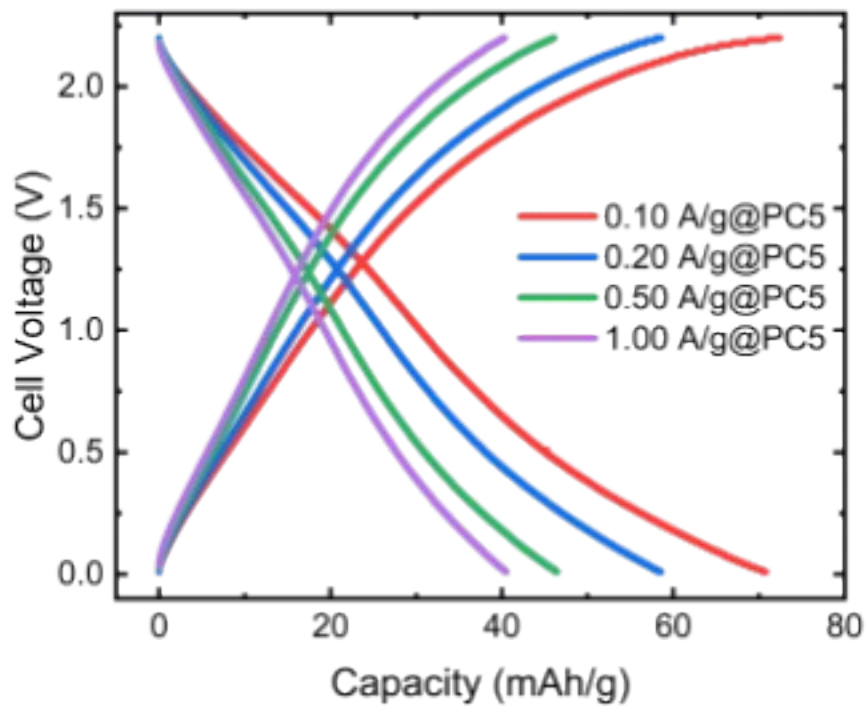

210

211 **Fig. S22** Galvanostatic charge and discharge curves of an aluminum-ion battery with the cathode  
212 material of PC5 at a series of current densities

213 PC5 (CNovel 20 nm) was commercially purchased and directly used as a cathode material

214

215

216

217

218



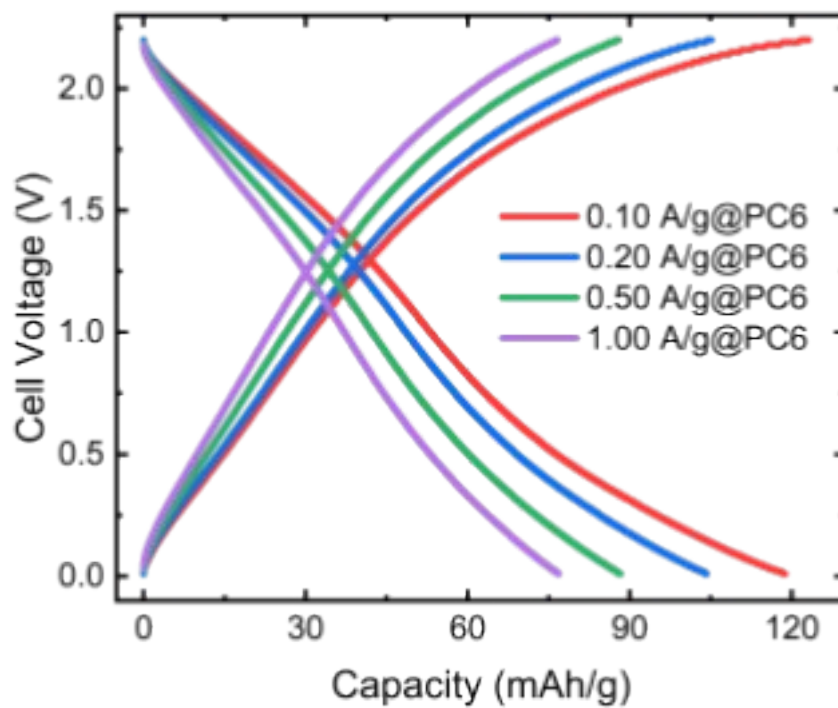

219

220 **Fig. S23** Galvanostatic charge and discharge curves of an aluminum-ion battery with the cathode  
221 material of PC6 at a series of current densities

222 PC6 (CNovel MJ4 010-00) was commercially purchased and directly used as a cathode material

223

224

225

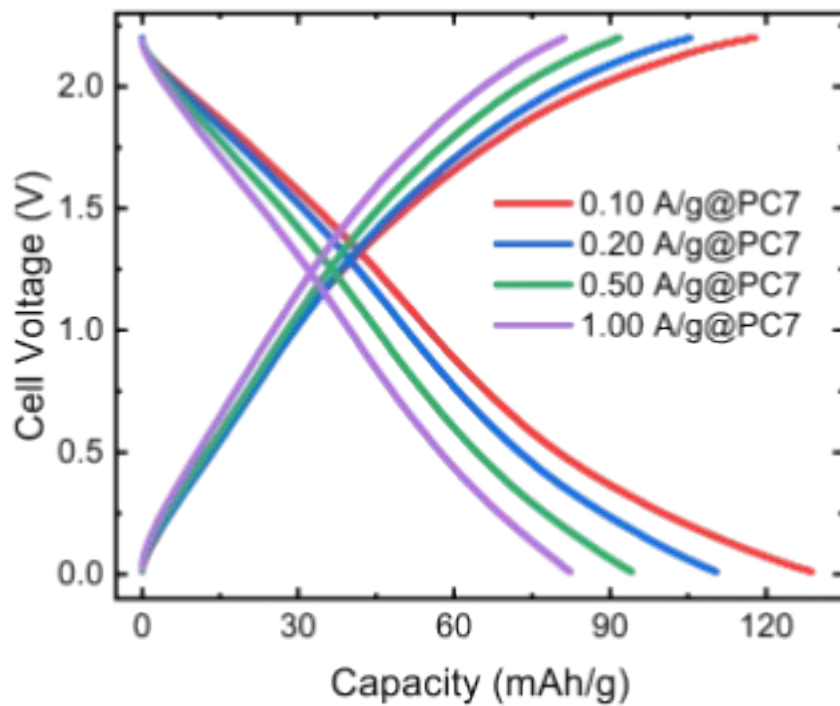

226

227 **Fig. S24** Galvanostatic charge and discharge curves of an aluminum-ion battery with the cathode  
228 material of PC7 at a series of current densities

229 PC7 (CNovel MH-00) was commercially purchased and directly used as a cathode material

230

231

232

233

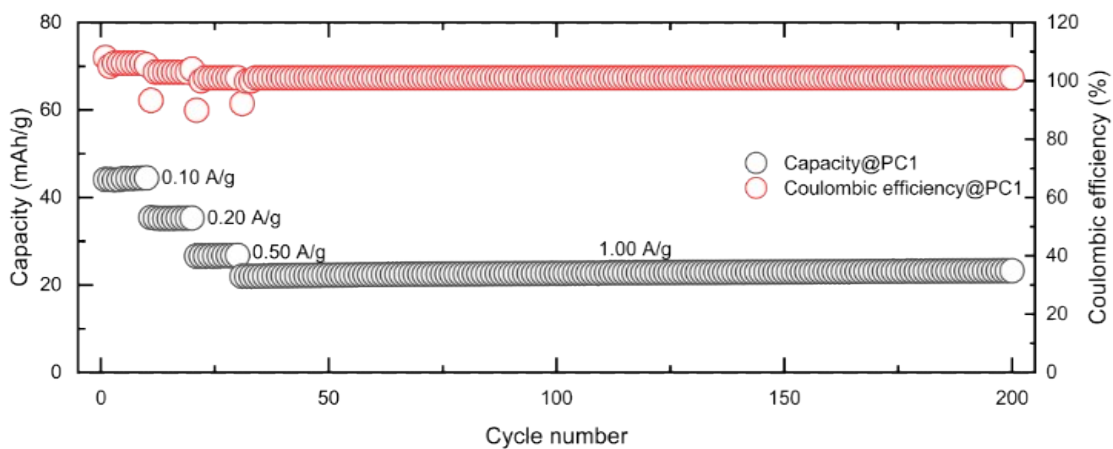

234

235 **Fig. S25** Discharge capability and coulombic efficiency of an aluminum-ion battery with the

236 cathode material of PC1 at a series of current densities

237 PC1 (YP50F) was commercially purchased and directly used as a cathode material

238

239

240

241

242

243

244

245

246

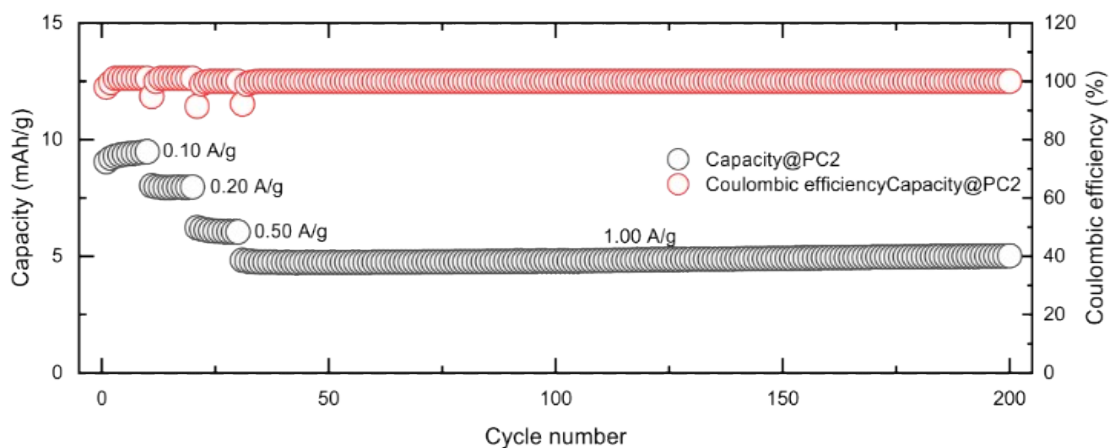

247

248 **Fig. S26** Discharge capability and coulombic efficiency of an aluminum-ion battery with the

249 cathode material of PC2 at a series of current densities

250 PC2 (MSP-20) was commercially purchased and directly used as a cathode material

251

252

253

254

255

256

257

258

259

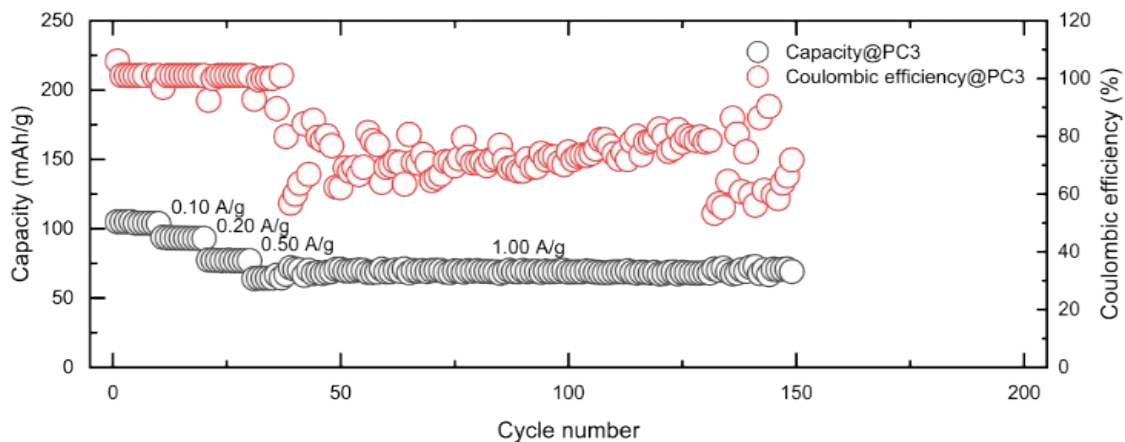

260

261 **Fig. S27** Discharge capability and coulombic efficiency of an aluminum-ion battery with the  
 262 cathode material of PC3 at a series of current densities

263 PC3 (MSA-20) was commercially purchased and directly used as a cathode material

264

265

266

267

268

269

270

271

272

273

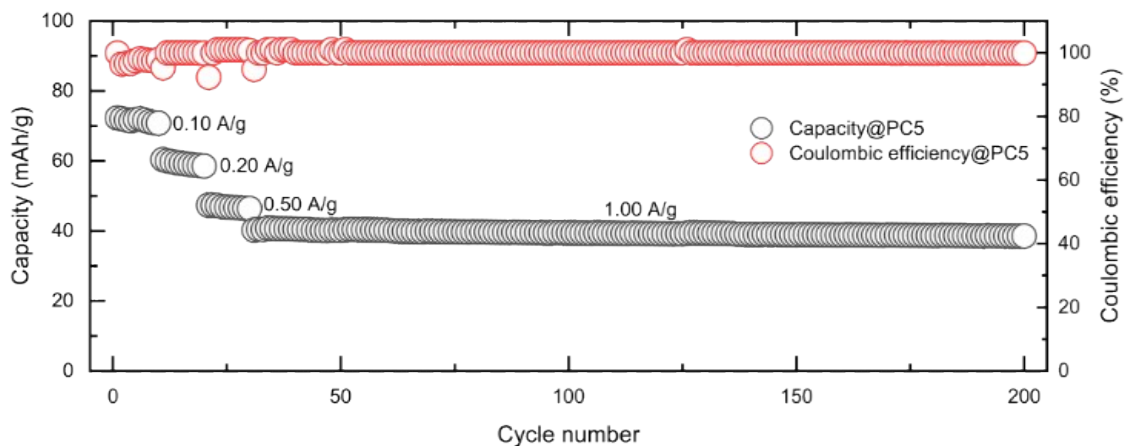

274

275 **Fig. S28** Discharge capability and coulombic efficiency of an aluminum-ion battery with the

276 cathode material of PC5 at a series of current densities

277 PC5 (CNovel 20 nm) was commercially purchased and directly used as a cathode material

278

279

280

281

282

283

284

285

286

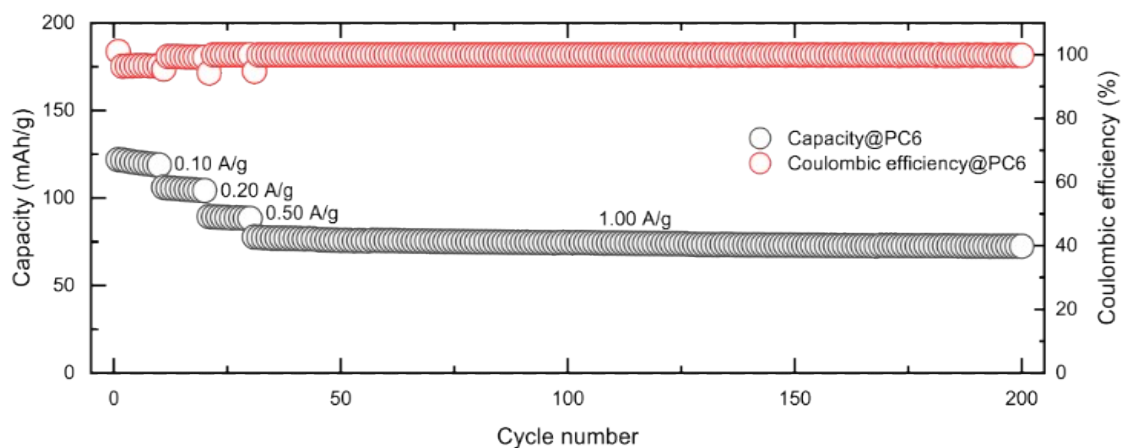

287

288 **Fig. S29** Discharge capability and coulombic efficiency of an aluminum-ion battery with the

289 cathode material of PC6 at a series of current densities

290 PC6 (CNovel MJ4 010-00) was commercially purchased and directly used as a cathode material

291

292

293

294

295

296

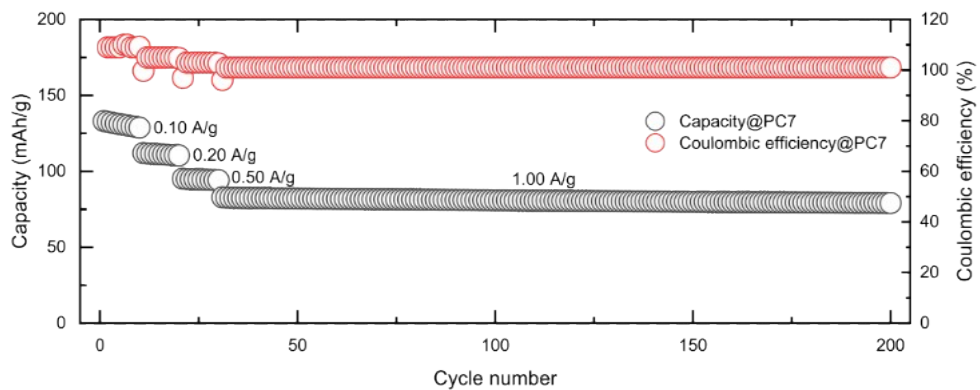

297

298 **Fig. S30** Discharge capability and coulombic efficiency of an aluminum-ion battery with the

299 cathode material of PC7 at a series of current densities

300 PC7 (CNovel MH-00) was commercially purchased and directly used as a cathode material

301

302

303

304

305

306

307

308

309

310

311



312 **Table S2** The fitting values of  $R_1$ ,  $R_2$ ,  $Z_w$ -R,  $Z_w$ -T,  $Z_w$ -P and  $C_1$  for PC1, PC2, PC3, PC4, PC5,

313 PC6 and PC7, along with the real part of impedance at 0.1 Hz that roughly corresponds to the

314  $Z_w+R_1+R_2$ .

| Sample                                                                                                                                    | The fitting values of $R_1$ ( $\Omega$ ) | The fitting values of $R_2$ ( $\Omega$ ) | The fitting values of $Z_w$ -R ( $\Omega$ ) | The fitting values of $Z_w$ -T                                                     | The fitting values of $Z_w$ -P | The fitting values of $C_1$ | The real part of impedance at 0.1 Hz ( $\Omega$ ) |
|-------------------------------------------------------------------------------------------------------------------------------------------|------------------------------------------|------------------------------------------|---------------------------------------------|------------------------------------------------------------------------------------|--------------------------------|-----------------------------|---------------------------------------------------|
| PC1                                                                                                                                       | 2.113                                    | 0.7356                                   | 4.688                                       | 0.10196                                                                            | 0.36671                        | 0.00011151                  | 20.5                                              |
| PC2                                                                                                                                       | 2.194                                    | 0.61106                                  | 5.578                                       | 0.14214                                                                            | 0.36463                        | 0.00011891                  | 18.2                                              |
| PC3                                                                                                                                       | 2.446                                    | 0.48036                                  | 4.909                                       | 1.246                                                                              | 0.39047                        | 0.00030301                  | 6.52                                              |
| PC4                                                                                                                                       | 1.812                                    | 0.22684                                  | 4.99                                        | 1.289                                                                              | 0.29148                        | 0.00019475                  | 7.21                                              |
| PC5                                                                                                                                       | 2.547                                    | 1.151                                    | 75.47                                       | 25.55                                                                              | 0.55218                        | 0.00049315                  | 13.6                                              |
| PC6                                                                                                                                       | 2.325                                    | 0.91136                                  | 28.64                                       | 6.194                                                                              | 0.48155                        | 0.00034412                  | 12.8                                              |
| PC7                                                                                                                                       | 2.289                                    | 0.29664                                  | 3.911                                       | 0.34656                                                                            | 0.32775                        | 0.00019481                  | 10.5                                              |
| 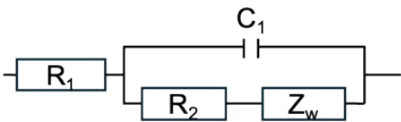 <p style="text-align: center;">Equivalent circuit</p> |                                          |                                          |                                             | $Z = R \cdot \frac{\coth[(j \cdot T \cdot \omega)^P]}{(j \cdot T \cdot \omega)^P}$ |                                |                             |                                                   |

315

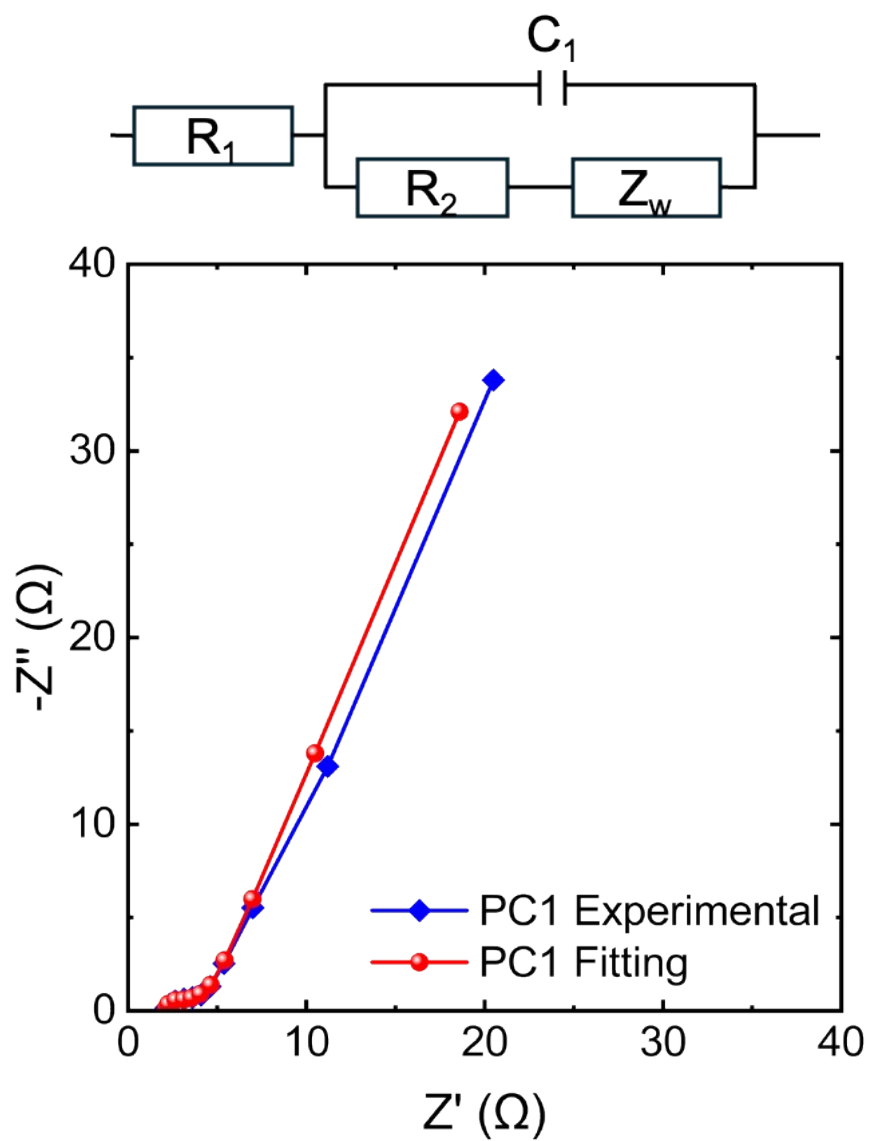

316

317 **Fig. S31** Nyquist plot of PC1 at 2.2 V and at an amplitude of 10.0 mV and frequencies ranging

318 from 1.0 MHz to 0.1 Hz and the fitted curve of PC1

319 PC1 (YP50F) was commercially purchased and directly used as a cathode material

320

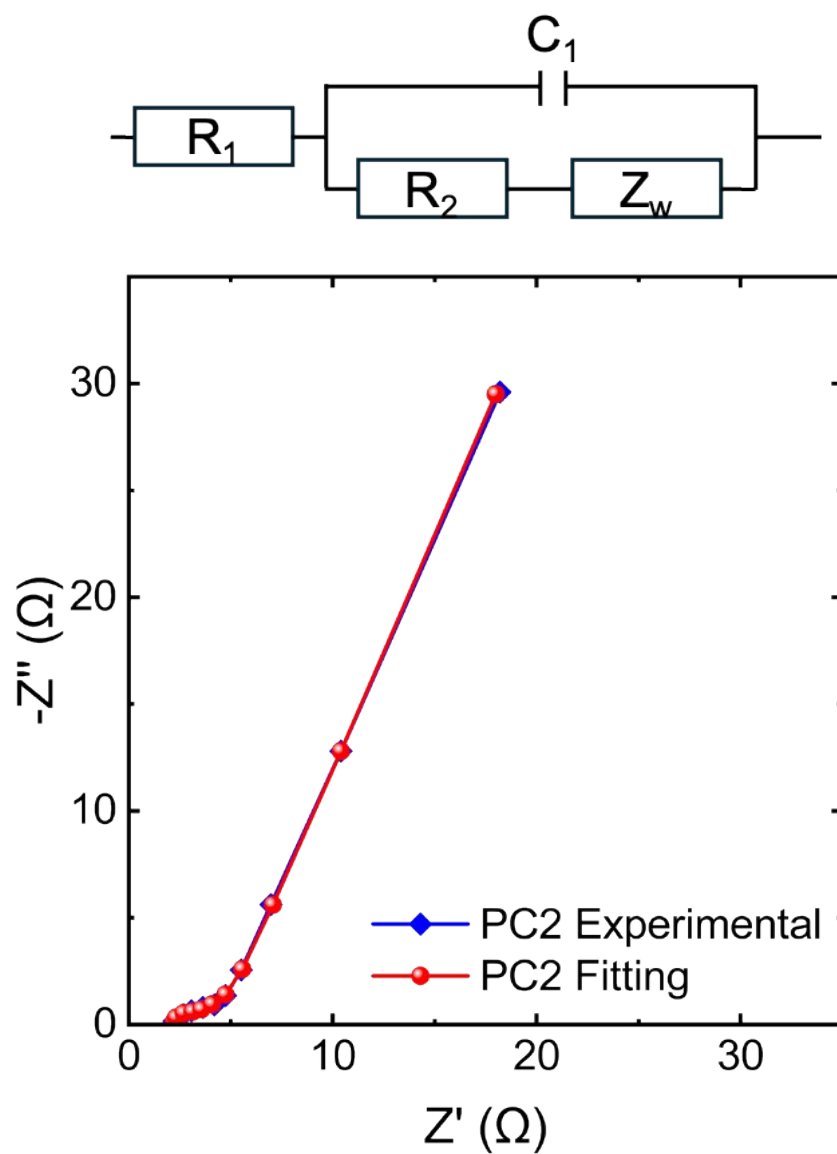

321

322 **Fig. S32** Nyquist plot of PC2 at 2.2 V and at an amplitude of 10.0 mV and frequencies ranging

323 from 1.0 MHz to 0.1 Hz and the fitted curve of PC2

324 PC2 (MSP-20) was commercially purchased and directly used as a cathode material

325

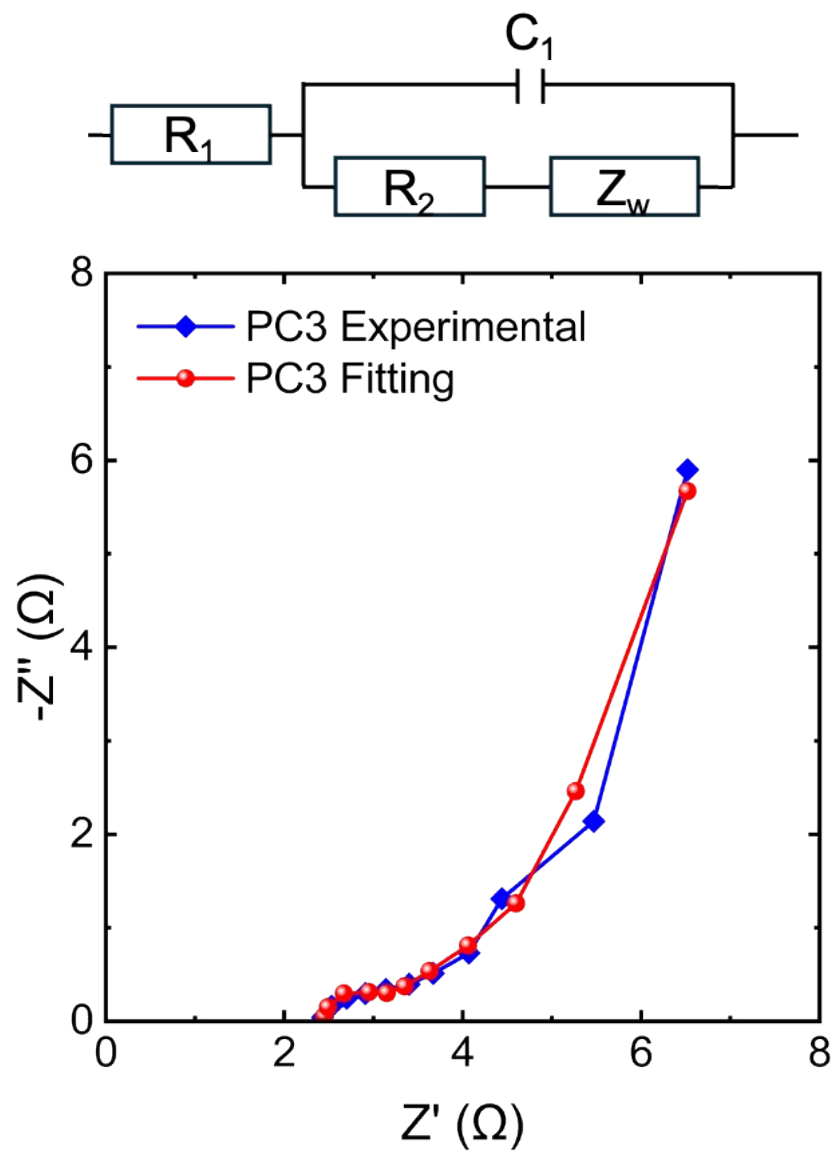

326

327 **Fig. S33** Nyquist plot of PC3 at 2.2 V and at an amplitude of 10.0 mV and frequencies ranging

328 from 1.0 MHz to 0.1 Hz and the fitted curve of PC3

329 PC3 was commercially purchased and directly used as a cathode material

330

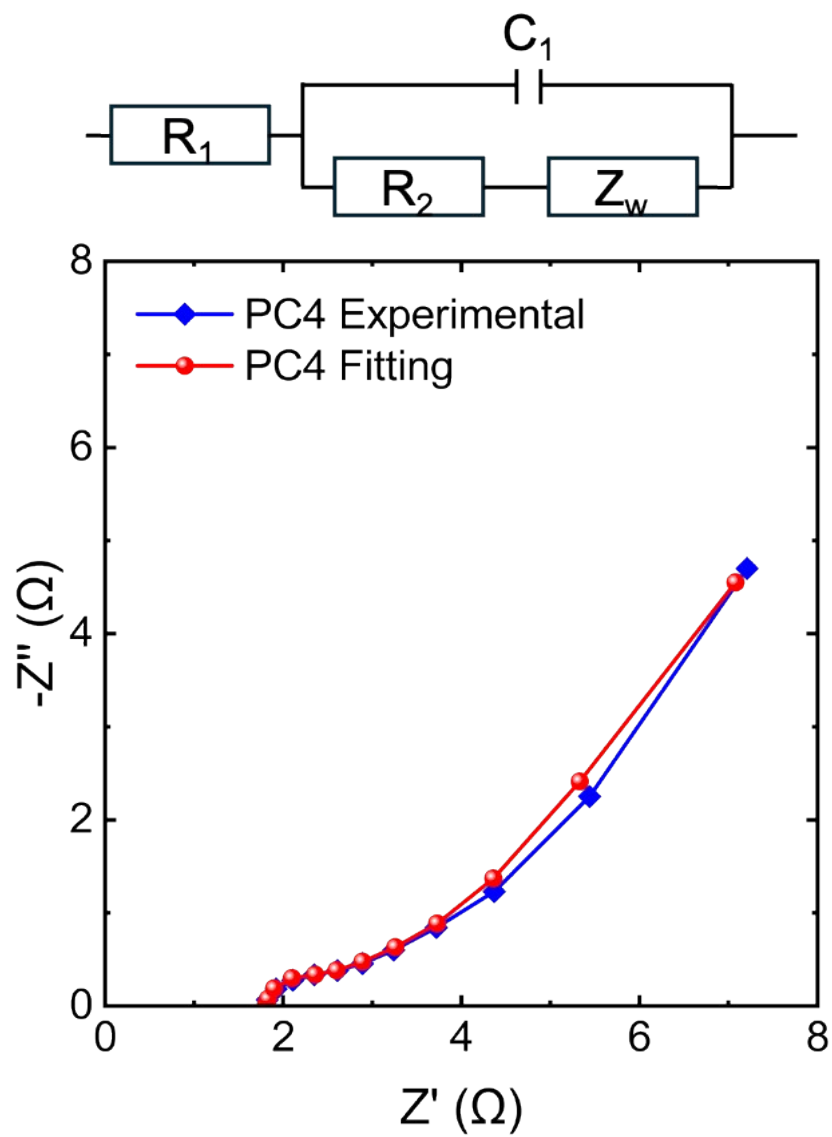

331

332 **Fig. S34** Nyquist plot of PC4 at 2.2 V and at an amplitude of 10.0 mV and frequencies ranging

333 from 1.0 MHz to 0.1 Hz and the fitted curve of PC4

334 PC4 (MSC-30) was commercially purchased and directly used as a cathode material

335

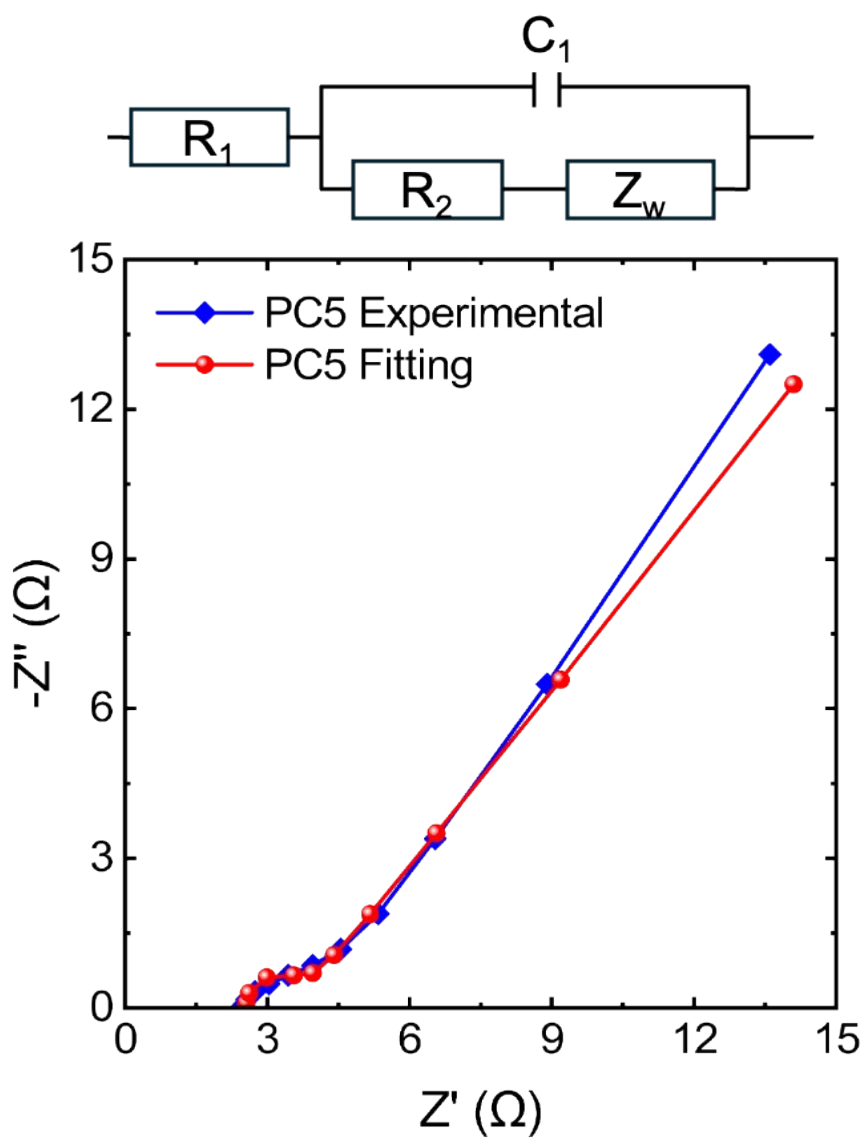

336

337 **Fig. S35** Nyquist plot of PC5 at 2.2 V and at an amplitude of 10.0 mV and frequencies ranging

338 from 1.0 MHz to 0.1 Hz and the fitted curve of PC5

339 PC5 (CNovel 20 nm) was commercially purchased and directly used as a cathode material

340

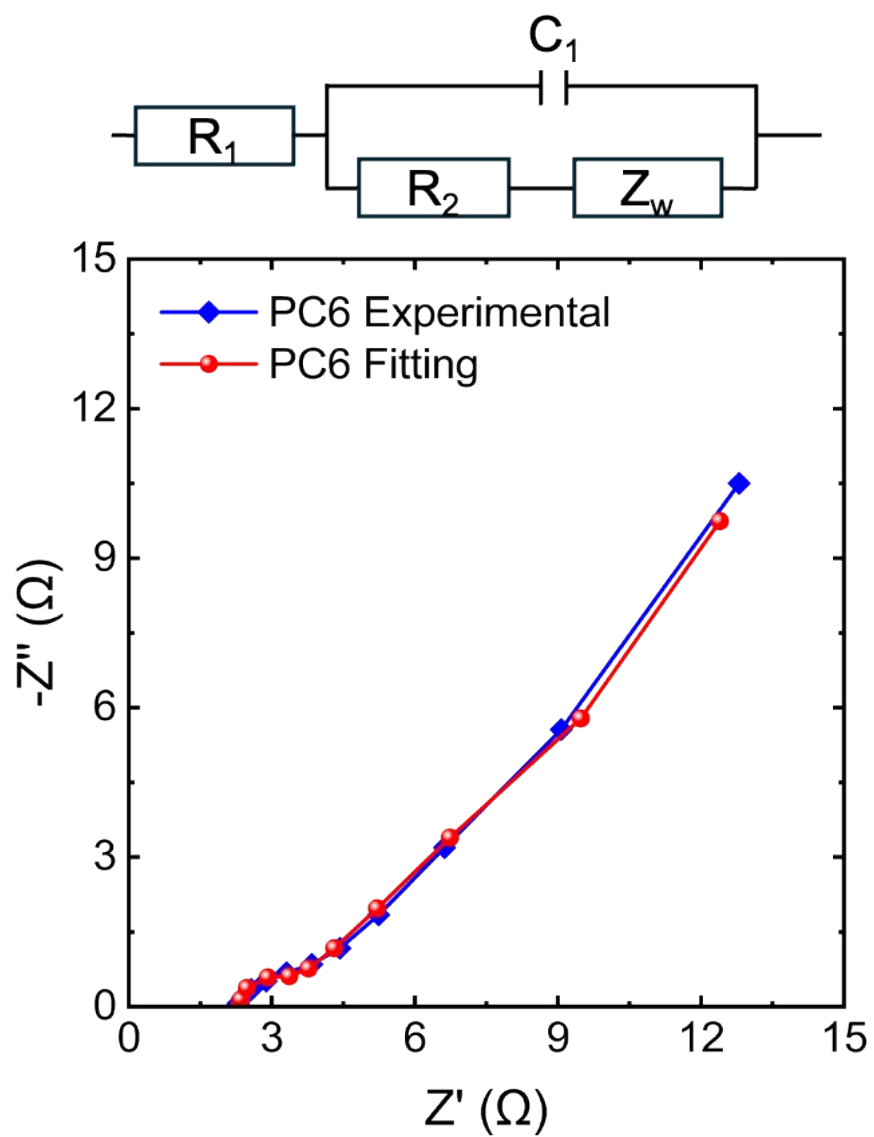

341

342 **Fig. S36** Nyquist plot of PC6 at 2.2 V and at an amplitude of 10.0 mV and frequencies ranging

343 from 1.0 MHz to 0.1 Hz and the fitted curve of PC6

344 PC6 (CNovel MJ4 010-00) was commercially purchased and directly used as a cathode material

345

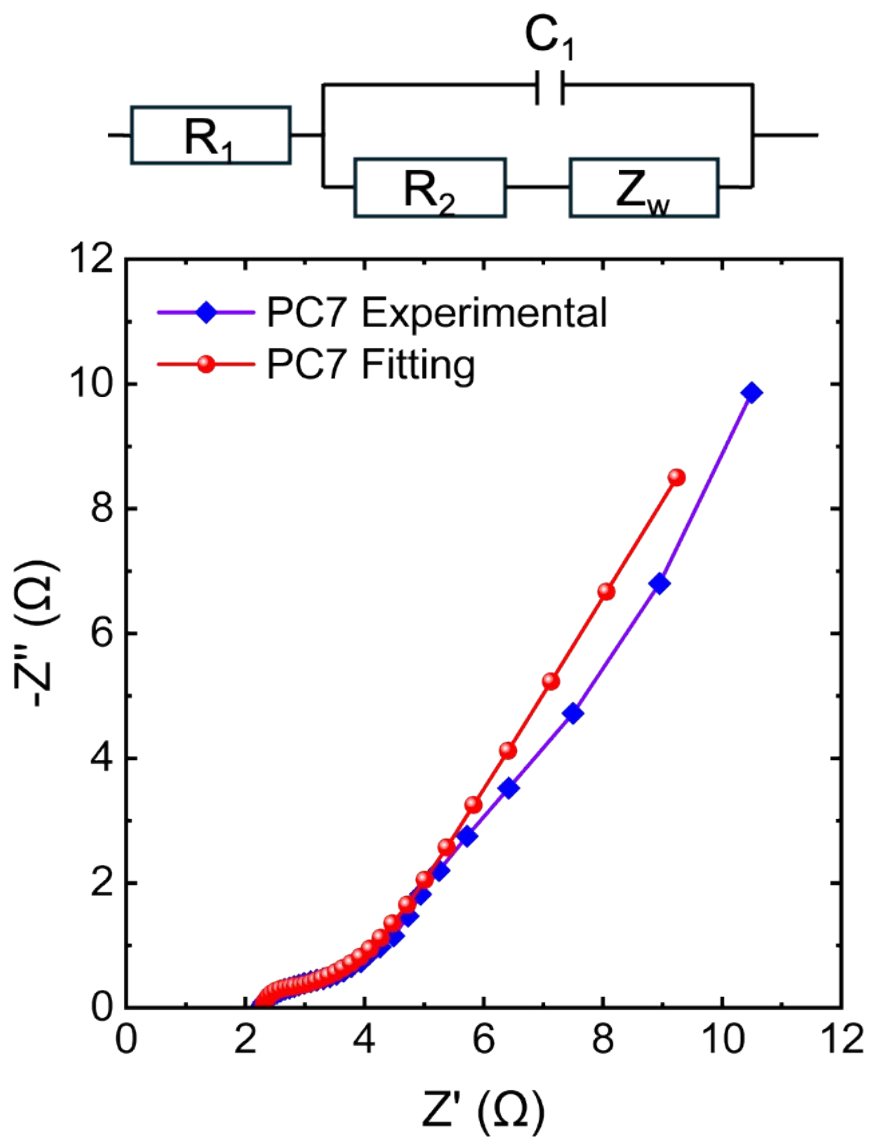

346

347 **Fig. S37** Nyquist plot of PC7 at 2.2 V and at an amplitude of 10.0 mV and frequencies ranging

348 from 1.0 MHz to 0.1 Hz and the fitted curve of PC7

349 PC7 (CNovel MH-00) was commercially purchased and directly used as a cathode material

350

351
